# Supplementary material
Source: publisher site journal article supplement (https://www.dovepress.com/article/273406)
Supplement: Supplementary file 1 [file get_supplementary_file.php]

**SUPPLEMENTARY TABLE**

| Supplementary Table S1. Baseline characteristics of SLAS participants (N=4617) by tea intake categories | | | | | | | | | | | | | | |
| --- | --- | --- | --- | --- | --- | --- | --- | --- | --- | --- | --- | --- | --- | --- |
|  |  | None | |  | <1 cup daily | |  | 1-2 cups daily | |  | ≥3 cups daily | |  |  |
|  |  |  |  |  |  |  |  |  |  |  |  |  |  |  |
|  | N of participants |  |  |  |  |  |  |  |  |  |  |  |  |  |
|  | Sex: Male | 30.0 | 605 |  | 35.1 | 344 |  | 43.0 | 542 |  | 48.1 | 334 |  | <0.001 |
|  | Female | 70.0 | 1411 |  | 64.9 | 637 |  | 57.0 | 719 |  | 51.9 | 361 |  |  |
|  | Age, years | 67.1 | 8.0 |  | 66.4 | 7.6 |  | 66.1 | 7.6 |  | 64.6 | 6.9 |  | 0.001 |
|  | Ethnicity: Chinese | 92.1 | 1854 |  | 90.6 | 888 |  | 86.1 | 1085 |  | 96.5 | 671 |  | 0.492 |
|  | Malay | 4.8 | 96 |  | 5.3 | 52 |  | 7.9 | 100 |  | 1.3 | 9 |  |  |
|  | Indian | 3.1 | 63 |  | 4.1 | 40 |  | 6.0 | 75 |  | 2.2 | 15 |  |  |
|  | Housing type: 1-2 rooms public | 17.1 | 344 |  | 16.6 | 163 |  | 12.8 | 162 |  | 8.3 | 58 |  | <0.001 |
|  | 3 rooms public | 30.0 | 604 |  | 27.2 | 267 |  | 22.8 | 288 |  | 16.8 | 117 |  |  |
|  | 4-5 room & private housing | 53.0 | 1068 |  | 56.2 | 551 |  | 64.3 | 811 |  | 74.8 | 520 |  |  |
|  | Smoking: Never | 80.8 | 1628 |  | 81.2 | 797 |  | 78.0 | 984 |  | 81.6 | 567 |  | 0.387 |
|  | Ex-smoker < 20 cigarettes per day | 6.4 | 129 |  | 7.7 | 76 |  | 8.5 | 107 |  | 8.5 | 59 |  |  |
|  | Ex-smoker 20+ cigarettes per day | 3.6 | 72 |  | 4.3 | 42 |  | 4.6 | 58 |  | 4.0 | 28 |  |  |
|  | Current smoker <20 cigarettes per day | 7.4 | 150 |  | 5.6 | 55 |  | 7.5 | 95 |  | 4.5 | 31 |  |  |
|  | Current smoker 20+ cigarettes per day | 1.8 | 37 |  | 1.1 | 11 |  | 1.3 | 17 |  | 1.4 | 10 |  |  |
|  | Alcohol daily | 4.0 | 80 |  | 3.2 | 31 |  | 5.5 | 69 |  | 5.0 | 35 |  | 0.046 |
|  | Physical activity: < 1x a month | 35.0 | 706 |  | 32.0 | 314 |  | 37.7 | 476 |  | 39.0 | 271 |  | 0.120 |
|  | 1x month to < 1x a week | 53.6 | 1080 |  | 54.8 | 538 |  | 50.9 | 642 |  | 48.9 | 340 |  |  |
|  | 1x a week or more | 11.4 | 230 |  | 13.1 | 129 |  | 11.4 | 144 |  | 12.1 | 84 |  |  |
|  | BMI, kg/m2 | 23.7 | 4.1 |  | 24.0 | 3.9 |  | 24.2 | 3.9 |  | 23.8 | 3.4 |  | 0.211 |
|  |  |  |  |  |  |  |  |  |  |  |  |  |  |  |
